# Supplementary material
Source: PubMed Central journal article supplement (PMC1413919)
Supplement: pnas_0511259103_2.pdf [file pnas_0511259103_2.pdf]

| Tumor | # of metaphases examined | Aberration(s)  | $\frac{\text{\# of metaphases w aberrations}}{\text{\# of total metaphases}}$ |
|-------|--------------------------|----------------|-------------------------------------------------------------------------------|
| T2945 | 8                        | Ts(5) Ts(11)   | 7/8                                                                           |
| T2961 | 15                       | 50 chromosomes | 15/15                                                                         |
| T2963 | 19                       | 52 chromosomes | 19/19                                                                         |
| T3038 | 8                        | 51 chromosomes | 8/8                                                                           |
| T3072 | 8                        | 49 chromosomes | 8/8                                                                           |
| T3091 | 9                        | 64 chromosomes | 9/9                                                                           |
| T3096 | 21                       | 49 chromosomes | 21/21                                                                         |
| T3110 | 21                       | 41 chromosomes | 21/21                                                                         |
