# Supplementary material
Source: PubMed Central journal article supplement (PMC1413919)
Supplement: pnas_0511259103_3.pdf [file pnas_0511259103_3.pdf]

| Tumor | # of metaphases examined | Aberration(s)                            | $\frac{\text{\# of metaphases w aberrations}}{\text{\# of total metaphases}}$ |
|-------|--------------------------|------------------------------------------|-------------------------------------------------------------------------------|
| T2965 | 8                        | t(14;2) t(9;13) t(9;17)                  | 8/8                                                                           |
| T3074 | 15                       | t(19;5)                                  | 13/15                                                                         |
| T3075 | 8                        | t(12;4)                                  | 4/8                                                                           |
| T3121 | 20                       | Rb(19;5)                                 | 18/20                                                                         |
| T3122 | 7                        | t(12;4) t(12;14) t(14;16)<br>t(12;19;14) | 6/7                                                                           |
