# Supplementary material
Source: PubMed Central journal article supplement (PMC1413919)

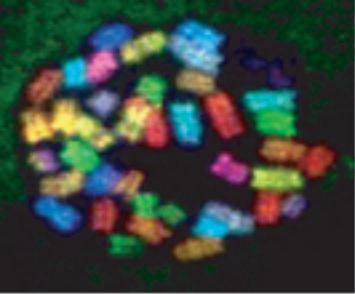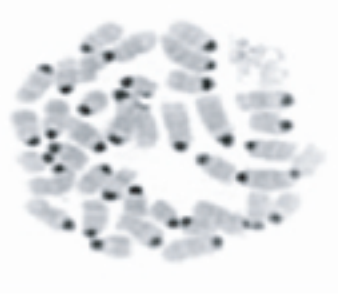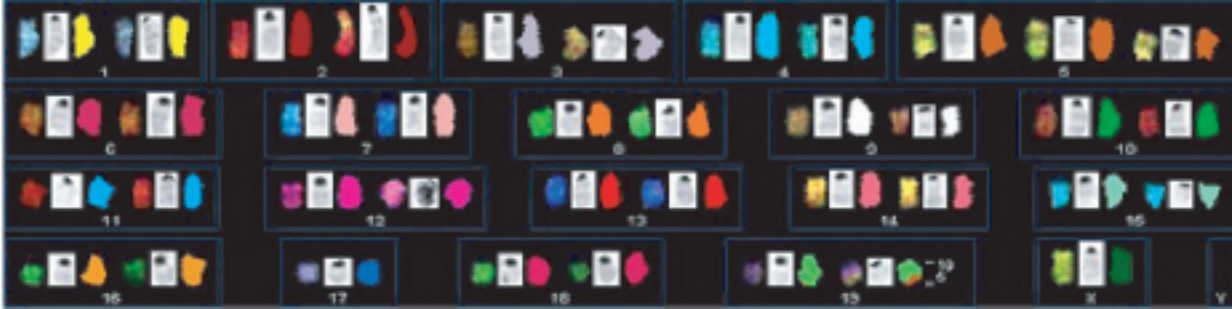

Supplement: pnas_0511259103_1.pdf [file pnas_0511259103_1.pdf]
